# The JNK- and AKT/GSK3 $\beta$ - Signaling Pathways Converge to Regulate Puma Induction and Neuronal Apoptosis Induced by Trophic Factor Deprivation

Kristin K. Ambacher<sup>1</sup>, Kristen B. Pitzul<sup>1</sup>, Meera Karajikar, Alison Hamilton, Stephen S. Ferguson, Sean P. Cregan\*

Robarts Research Institute and Department of Physiology and Pharmacology, University of Western Ontario, London, Ontario, Canada

## Abstract

The AKT, GSK3 and JNK family kinases have been implicated in neuronal apoptosis associated with neuronal development and several neurodegenerative conditions. However, the mechanisms by which these kinase pathways regulate apoptosis remain unclear. In this study we have investigated the role of these kinases in neuronal cell death using an established model of trophic factor deprivation induced apoptosis in cerebellar granule neurons. BCL-2 family proteins are known to be central regulators of apoptosis and we have determined that the pro-apoptotic family member Puma is transcriptionally up-regulated in trophic factor deprived neurons and that Puma induction is required for apoptosis *in vitro* and *in vivo*. Importantly, we demonstrate that Puma induction is dependent on both JNK activation and AKT inactivation. AKT is known to regulate a number of downstream pathways, however we have determined that PI3K-AKT inactivation induces Puma expression through a GSK3 $\beta$ -dependent mechanism. Finally we demonstrate that the JNK and AKT/GSK3 $\beta$  pathways converge to regulate FoxO3a-mediated transcriptional activation of Puma. In summary we have identified a novel and critical link between the AKT, GSK3 $\beta$  and JNK kinases and the regulation of Puma induction and suggest that this may be pivotal to the regulation of neuronal apoptosis in neurodegenerative conditions.

**Citation:** Ambacher KK, Pitzul KB, Karajikar M, Hamilton A, Ferguson SS, et al. (2012) The JNK- and AKT/GSK3 $\beta$ - Signaling Pathways Converge to Regulate Puma Induction and Neuronal Apoptosis Induced by Trophic Factor Deprivation. PLoS ONE 7(10): e46885. doi:10.1371/journal.pone.0046885

**Editor:** Michal Hetman, University of Louisville, United States of America

**Received:** May 16, 2012; **Accepted:** September 7, 2012; **Published:** October 3, 2012

**Copyright:** © 2012 Ambacher et al. This is an open-access article distributed under the terms of the Creative Commons Attribution License, which permits unrestricted use, distribution, and reproduction in any medium, provided the original author and source are credited.

**Funding:** This work was supported by grants from the Canadian Institutes of Health Research (MOP-68995) and the Heart and Stroke Foundation of Ontario (NA-7380). The funders had no role in study design, data collection and analysis, decision to publish, or preparation of the manuscript.

**Competing Interests:** The authors have declared that no competing interests exist.

\* E-mail: scregan@robarts.ca

† These authors contributed equally to this work.

## Introduction

Apoptosis is a form of programmed cell death that is required in many physiological processes such as embryogenesis, cell turnover and response to pathogens. On the other hand aberrant apoptosis has been implicated in several neurodegenerative conditions including Parkinson's disease, Huntington's disease and Alzheimer's disease as well as acute injuries such as stroke and spinal cord injury [1–5]. Therefore, understanding the upstream signaling pathways that regulate apoptosis in neurons is crucial for the development of treatments for these devastating neurological conditions.

Kinase signaling pathways play a key role in signal transduction in all cellular processes including apoptosis. Three kinase pathways in particular are important for apoptotic signaling in neurons: the c-Jun N-terminal kinase (JNK) pathway, the glycogen synthase kinase-3 (GSK3), and the protein kinase B (AKT) pathway (reviewed in [6–8]). The JNK pathway is pro-apoptotic and JNK itself is known to be activated in several models of neuronal apoptosis including excitotoxicity, trophic factor withdrawal and ischemia (reviewed in [9]). Furthermore, inhibition of JNK signaling using genetic and pharmacological approaches has been shown to protect neurons against several different apoptotic stimuli [10–13]. Similarly, GSK3 $\beta$  has been found to play a pro-apoptotic

role in several models of neuronal cell death including serum deprivation, DNA damage and A $\beta$  induced toxicity [14–16]. Additionally, while inhibition of GSK3 promotes cell survival, overexpression of active GSK3 $\beta$  has been shown to promote neuronal apoptosis [17]. In contrast to the JNK and GSK3 pathways, AKT serves as a pro-survival signaling pathway (reviewed in [6]) and inactivation of AKT signaling has been implicated in many apoptotic paradigms [18–20]. The AKT pathway can be activated in neurons by trophic factors such as insulin-like growth factor (IGF-1) and nerve growth factor (NGF) resulting in promotion of cell survival and protection of neuronal cells against apoptotic stimuli [21–24]. While the JNK-, GSK3 $\beta$ - and AKT- pathways have been established as key players in neuronal apoptosis, the downstream targets that link these kinases to the apoptotic machinery has not been clearly defined.

The intrinsic pathway of apoptosis is mediated by the Bcl-2 family of proteins. These proteins are subdivided into pro-apoptotic, anti-apoptotic and BH3-only pro-apoptotic members (reviewed in [25]). Previous studies have established Bax as the key pro-apoptotic player in diverse neuronal apoptotic paradigms [26–31]. In response to apoptotic stimuli Bax translocates to the mitochondria where it causes outer mitochondrial membrane permeabilization and release of cytochrome-c leading to caspase activation and ultimately cell death [32,33]. Activation of Bax is

thought to be dependent on the third class of Bcl-2 proteins – the BH3-domain-only subclass – which includes proteins such as Bad, Noxa, Bid, Bim, Hrk/DP5, and Puma. These BH3-only proteins are activated through transcriptional and post-translational mechanisms in response to distinct cellular stresses [25]. Due to their pivotal role in regulating Bax activation BH3-only proteins have received significant attention as potential targets of kinase pathways involved in the regulation of neuronal apoptosis.

We have investigated the potential role of JNK, GSK3 and AKT signaling in the regulation of BH3-only proteins in cerebellar granule neurons (CGNs) undergoing apoptosis in response to potassium deprivation. This established model of trophic factor deprivation induced neuronal apoptosis is believed to mimic aspects of synaptic dysfunction common to many neuronal injury and neurodegenerative conditions [34]. Apoptotic cell death in this paradigm has been demonstrated to be Bax-dependent [26] and to involve the JNK, GSK3 and AKT signaling pathways [35–37]. Importantly, in the present study we demonstrate that the BH3-only member Puma is essential for trophic factor deprivation induced apoptosis in CGNs and establish that the JNK-, AKT- and GSK3-family kinases converge to regulate the transcriptional induction of Puma and neuronal apoptosis.

## Materials and Methods

### Ethics Statement

This study was performed in strict accordance with the recommendations in the Canadian Council on Animal Care Guidelines. The protocol was approved by the Animal Use Subcommittee of the University of Western Ontario (Permit Number: 2009-099).

### Animals

Mice carrying targeted null mutations for Puma or Bim were generated on a C57BL/6 background in the laboratory of Dr. Andreas Strasser (WEHI, Victoria, Australia). The genotyping of these mice was performed as previously described [38,39]. In other experiments neurons were derived from CD1 mice obtained from Charles River Laboratories (Point-Claire Quebec).

### Neuronal Cell Cultures

Primary cerebellar granule neurons (CGNs) were extracted from P7 mice brains by enzymatic and mechanical dissociations as previously described [40]. Cells were resuspended in Neurobasal medium containing B27 and N2 supplements, 0.5X Glutamax (Invitrogen Canada, Burlington Ontario) and 25 mM potassium chloride (KCl) and plated at a density of  $0.75 \times 10^6$  cells/ml of medium. Apoptosis was induced after 7 days by switching culture media to Neurobasal medium containing 0.5X Glutamax and 5 mM KCl. In indicated studies, pharmacological agents were added to cultures simultaneous to medium change at the following concentrations: SP600125, SB415286, recombinant IGF-1, LY294002 (all from Sigma-Aldrich Canada, Oakville Ontario) and AR-A014418 (Calbiochem Gibbstown, New Jersey).

### Adenoviral and Lentiviral shRNA Constructs

Adenovirus expressing HA-tagged constitutively active (CA) AKT (N-terminus of AKT1 fused to a c-Src myristoylation sequence) was obtained from Vector Biolabs (Philadelphia, PA). The Ad-CA-AKT and Ad-GFP vectors were amplified and titered as previously described and CGNs were infected with adenoviruses on the day of plating as previously described [41]. Lentivirus expressing shRNA directed against FoxO3a (sc-37888-V) and control lentivirus (sc-108080) were purchased from Santa Cruz

Biotech. CGNs were transduced with lentiviral particles at the time of plating.

### Cell Death and Survival Assays

Apoptosis of CGNs was assessed by examining nuclear morphology following Hoechst 33342 staining as previously described [42]. Briefly, Hoechst stain (1  $\mu$ g/mL) was added directly to medium and incubated for 20 minutes at 37°C. Cells were visualized by fluorescence microscopy (IX70; Olympus, Tokyo, Japan) and images were captured from random fields with a CCD camera (Q-imaging, Burnaby, British Columbia, Canada). The fraction of apoptotic nuclei characterized by condensed chromatin and/or apoptotic bodies was scored by a blind observer. A minimum of 500 cells were analyzed per treatment.

### TUNEL Staining

Seven day old mouse pups (P7) were anaesthetized with Xylazine:Ketamine (2:1) and cardiac perfused with 4% paraformaldehyde. The brains were removed and fixed overnight by immersion in 4% paraformaldehyde and then cryoprotected by immersion in 30% sucrose. Sagittal sections of the cerebellum were cut with a cryostat at 20  $\mu$ m thickness and mounted onto gelatin coated microscope slides. Every 5<sup>th</sup> section was stained for apoptotic cells using the FragEL DNA fragmentation Detection Kit (Calbiochem) according to manufacturer's directions. Stained sections were visualized using a Nikon Labophot-2 microscope and images were captured using Image-Pro Plus software. The number of TUNEL positive cells in the internal granule layer (IGL) of cerebellar lamellae was scored by an observer blinded to the genotype. The mean number of TUNEL positive cells per IGL field was determined from a minimum of 24 images captured from 8 sections per animal.

### Mitotracker Red Staining

Mitochondrial membrane potential was assessed using Mitotracker Red<sup>®</sup> stain (Invitrogen Canada Burlington, Ontario) as previously described [42]. Briefly, cells were incubated for 20 minutes with 100 nM Mitotracker Red and staining was visualized by fluorescence microscopy using a standard TRITC filter set. Percentage of cells stained with Mitotracker Red was counted and represents percentage of cells in which mitochondrial membrane potential was maintained. A minimum of 500 cells were analyzed per treatment.

### Caspase 3-like Activity Assay

Neurons were collected in caspase lysis buffer (10 mM Hepes, 1 mM KCl, 1.5 mM MgCl<sub>2</sub>, 10% glycerol, 5  $\mu$ g/ml aprotinin, 2  $\mu$ g/ml leupeptin, 0.1% nonyl phenoxypolyethoxyethanol (NP-40), 1  $\mu$ M Dithiothreitol (DTT), and 0.2 mg/ml phenylmethanesulphonylfluoride (PMSF)) and lysed on ice for 20 minutes. Protein was separated by centrifugation and 5  $\mu$ g per sample was incubated with caspase reaction buffer (1 M Hepes, 1 M DTT, 1 mg/ml sucrose, 1 mg/ml 3[(3-Cholamidopropyl)dimethylammonio]-propanesulfonic acid (Chaps) buffer) and 15  $\mu$ M AC-DEVD-AFC peptide substrate (Biomol). Fluorescence emitted by cleavage of peptide substrate was measured after 15 and 45 minutes using a Victor3 plate reader (Perkin Elmer) and difference in fluorescence between the two time points is used to represent caspase 3-like activity.

### Quantitative RT-PCR

RNA was isolated using Trizol reagent as per manufacturer's instructions (Invitrogen Canada, Burlington, Ontario) and 40 ng

of total RNA was used in one-step SYBR green reverse transcription PCR (QuantiFast SYBR Green PCR Kit; Qiagen, Toronto, ON). The RT-PCR program was performed on a Chromo4 system (MJ Research, Watertown, MA) and changes in gene expression were calculated using the  $\Delta(\Delta C_t)$  method; S12 transcript was used for normalization as previously described [30]. Values are reported as fold increase in mRNA levels in treated samples over control samples. Primer sequences are available on request.

### Western Blot Analysis

Neurons were lysed and incubated on ice for 25 minutes in RIPA lysis buffer (150mM sodium chloride, 1% NP-40, 0.5% sodium deoxycholate, 0.1% SDS, 50 mM Tris pH 8.0, 1 mM EDTA, 1 mM DTT, 1:100 protease inhibitor cocktail, 1:100 phosphatase inhibitor cocktail (Sigma Aldrich)) and whole-cell protein lysates were recovered by centrifugation. Protein concentration was measured using a BCA assay (Pierce, Rockford, IL) and protein was separated on 10% SDS-PAGE gels and transferred to nitrocellulose membrane (GE Healthcare). Membranes were blocked in TBS-T (10 mM Tris, 150 mM NaCl, 0.05% Tween 20) containing 5% fat-free milk for one hour and then incubated overnight with primary antibody in 3% fat-free milk in TBS-T. Membranes were then washed in TBS-T and then incubated in HRP-conjugated IgG secondary antibodies for one hour. Membranes were washed again in TBS-T and visualized by chemiluminescence according to manufacturer's instructions (SuperECL; Pierce, Rockford IL). The following primary antibodies were used: Phospho-AKT (4058S; Cell Signaling), Phospho-ATF2 (9225S; Cell Signaling), ATF3 (C19; Santa Cruz Biotechnology), Calnexin (H-70; Santa Cruz Biotechnology), Phospho-c-Jun (2316S; Cell Signaling), Phospho-GSK3 $\beta$  (Ab 2479; Abcam), Bim (AAP-330; Stressgen), FoxO3a (H-144; Santa Cruz Biotech), Phospho(Thr32)-FoxO3a (9464; Cell Signaling) and Puma (3043; Prosci Incorporated).

### Data Analysis

Data are reported as mean and standard error of the mean. The value  $n$  represents the number of neuron cultures from independent experiments/platings or number of pups of indicated genotype from which independent neuron cultures were prepared involving at least three independent experiments. Differences between groups were determined by ANOVA and *post hoc* Tukey's test and were considered statistically significant when  $p < 0.05$ .

## Results

### Puma Expression is Induced Following Potassium Withdrawal and is Required for Cell Death

The specific BH3-only genes involved in apoptotic signaling as well as the mechanisms by which they are regulated varies depending on the cell type and death stimulus. In CGNs apoptosis induced by potassium withdrawal can be prevented by actinomycin-D or cycloheximide suggesting that *de novo* transcription is critical to the initiation of apoptosis and likely to the activation of BH3-only proteins [43]. We therefore examined expression of BH3-only genes following potassium withdrawal in CGNs using quantitative RT-PCR (Figure 1A). We found no change in transcript levels of several BH3-only family members including Noxa, Bid and Bad (data not shown), however consistent with previous reports we observed an increase in Bim and Hrk/DP5 mRNA levels [44,45]. Interestingly, we also observed a marked increase in Puma mRNA, a relatively unstudied BH3-only member in this context (Figure 1A). Consistent with the increase

in mRNA, Bim and Puma protein levels were also found to be elevated following potassium withdrawal (Figure 1B). Several studies including those from our research group have demonstrated that Puma plays a key role in regulating neuronal apoptosis in diverse injury paradigms [30,46–51]. Therefore, we sought to determine whether Puma is required for potassium deprivation induced apoptotic cell death in cerebellar granule neurons. To address this we compared the level of apoptotic cells in CGNs derived from Puma-deficient and wild type littermates subjected to potassium withdrawal. We found that neurons lacking Puma exhibited a marked decrease in the number of apoptotic nuclei compared with wild type cells following potassium withdrawal (Figure 2A and 2B). One of the critical steps in the intrinsic apoptotic pathway is Bax-mediated mitochondrial depolarization and mitochondrial outer membrane permeabilization [26,40]. Therefore we examined the role of Puma in regulating these Bax-mediated apoptotic processes. To assess mitochondrial membrane potential we stained wild type and Puma deficient neurons with the mitochondria potentiometric dye Mitotracker Red. In contrast to wildtype neurons the vast majority of Puma deficient neurons maintained the ability to uptake Mitotracker Red under low potassium conditions indicating that Puma is required for mitochondrial membrane depolarization (Figure 2C). Similarly we found that cytochrome-c was retained in the mitochondria of Puma deficient neurons indicating that Puma is required for Bax induced mitochondrial membrane permeabilization (data not shown). Furthermore, while potassium deprivation resulted in a robust induction of caspase-3-like activity in wild type neurons this was markedly reduced in Puma-deficient neurons (Figure 2D). As Bim has also been implicated in neuronal apoptosis induced by trophic factor deprivation [71,72], we also examined the level of apoptosis in CGNs derived from Bim-null mice following potassium deprivation. In contrast to Puma-deficient CGNs we found that Bim-deficient CGNs exhibited only a modest decrease in apoptosis following potassium withdrawal as compared to wild type neurons (Figure 2E).

We next examined whether Puma contributes to cerebellar granule neuron apoptosis during postnatal development *in vivo*. As shown in Figure 3, the number of TUNEL positive cells in the cerebellar inner granule layer of post-natal day 7 Puma-deficient mice was found to be significantly reduced as compared to that in wild type mice indicating that Puma also contributes to CGN apoptosis *in vivo*. Taken together these results suggest that Puma is essential for Bax activation and apoptotic cell death induced by trophic factor deprivation in CGNs.

### JNK Activation is Required for Puma Induction During Potassium Deprivation Induced Apoptosis

The c-Jun N-terminal kinase (JNK) pathway has been found to promote cell death signaling in several models of apoptosis including potassium withdrawal in CGNs [7,36]. In light of our finding that Puma induction is required for apoptosis we examined whether JNK signaling was required for Puma induction in this paradigm. Indeed we found that the potassium deprivation induced increase in Puma mRNA levels was markedly reduced in the presence of the JNK inhibitor SP600125 (Figure 4A). Furthermore, we found that JNK inhibition also prevented the potassium withdrawal induced increase in Puma protein as well as the induction of several known JNK responsive transcription factors including ATF3, P-ATF2 and P-c-Jun (Figure 4B). Consistent with its effects on Puma expression JNK inhibition significantly decreased the level of apoptosis in potassium deprived CGNs (Figure 4C). These results suggest that JNK signaling is

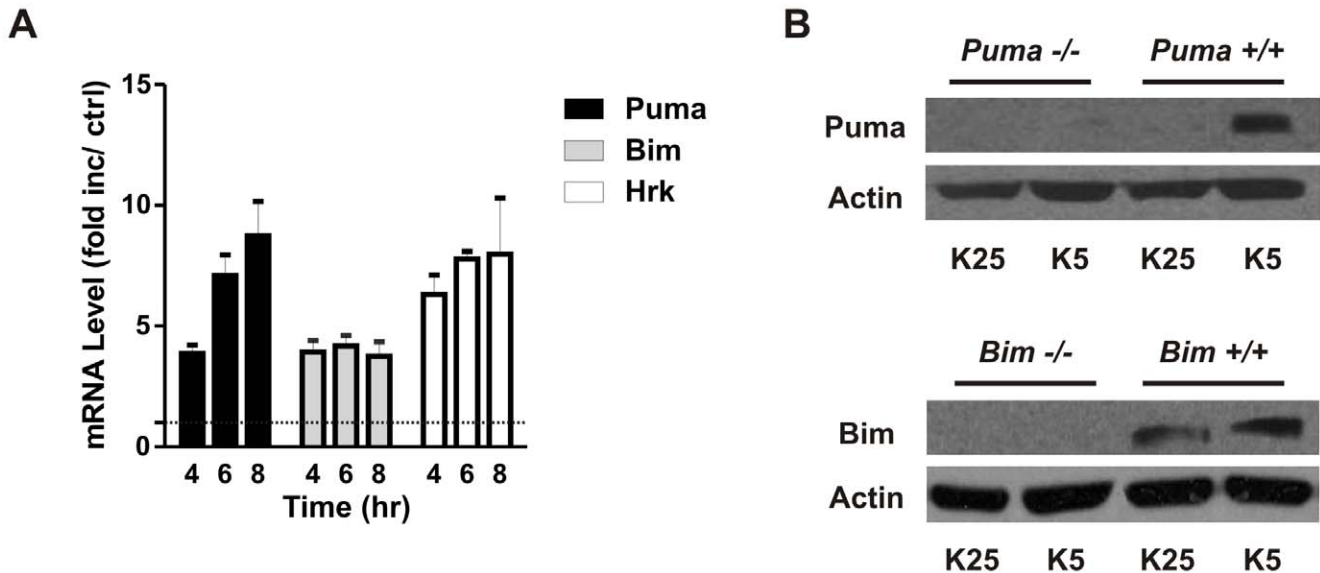

**Figure 1. Puma expression is induced by potassium withdrawal in cerebellar granule neurons.** After 7 days in culture CGNs were either maintained in media containing 25 mM potassium (K25) or switched to low potassium medium containing 5 mM potassium (K5). **A**, RNA was harvested after 4, 6 and 8 hours and Puma, Bim and Hrk expression was analyzed by qRT-PCR. Expression was normalized to ribosomal S12 levels and is reported as fold increase over untreated controls ( $n=4$ ,  $p<0.05$ ). **B**, Protein extracts were collected from CGNs derived from Puma<sup>+/+</sup> and Puma<sup>-/-</sup> littermates or Bim<sup>+/+</sup> and Bim<sup>-/-</sup> littermates 8 hours after potassium withdrawal and Puma and Bim protein levels were analyzed by western blot. Actin was included as a loading control. doi:10.1371/journal.pone.0046885.g001

required for Puma induction during potassium deprivation induced neuronal apoptosis.

#### Protein Kinase B/AKT Inactivation is Required for Puma Induction in Potassium Deprivation Induced Neuronal Apoptosis

Protein kinase B (or AKT) is also known to modulate neuronal apoptosis but in contrast to the JNK pathway it does so in a pro-survival manner [6]. It has previously been demonstrated that AKT activity is decreased in trophic factor deprived neurons and that activation of the PI3K-AKT pathway is neuroprotective [22,23]. Therefore we examined whether AKT inactivation may also be involved in the regulation of Puma expression. To address this we examined Puma induction in potassium deprived CGNs in the presence or absence of insulin-like growth factor-1 (IGF-1) a known activator of the PI3K-AKT pathway [21]. As shown in Figure 5A, IGF-1 prevented the potassium withdrawal induced decrease in P-AKT levels and suppressed the increase in Puma protein. Consistent with this, IGF-1 also significantly decreased Puma mRNA induction in potassium deprived neurons (Figure 5B) and protected against apoptotic cell death (Figure 5C). IGF-1 can activate pathways in addition to AKT therefore to further examine the role of AKT we compared Puma mRNA levels in CGNs transduced with a recombinant adenovirus expressing constitutively active AKT (CA-AKT) or green fluorescent protein (GFP) as a control. As shown in Figure 5D, Puma mRNA induction by potassium deprivation was significantly reduced in CGNs expressing CA-AKT as compared to Ad-GFP infected or uninfected neurons.

Previous studies suggest that inhibition of the PI3K/AKT pathway is in itself sufficient to induce apoptosis in neurons [20,23,35]. Therefore we investigated whether cell death induced by AKT inactivation was mediated by Puma. To address this we examined Puma expression in CGNs treated with the PI3K inhibitor LY294002 under high (normal) potassium conditions.

PI3K inhibition by LY294002 resulted in a substantial reduction in P-AKT levels and a corresponding increase in Puma protein and mRNA levels (Figures 6A and 6B). We found that the increase in Puma mRNA expression induced by LY294002 was attenuated in CGNs expressing CA-AKT suggesting that AKT inactivation is primarily responsible for the LY294002 induced Puma expression (Figure 6B). Finally, to determine whether Puma is necessary for neuronal cell death induced by PI3K-AKT inactivation we examined LY294002 induced apoptosis in CGNs derived from Puma-deficient mice and wild type littermates. As depicted in Figure 6C, LY294002 induced significant levels of apoptosis in wild type (~35% at 24 hours) but not Puma deficient (<10%) neurons indicating that Puma is necessary for cell death induced by PI3K-AKT inactivation. Taken together these results suggest that AKT inactivation is a key determinant of Puma induction in neuronal apoptosis.

#### AKT Functions Through GSK3 $\beta$ to Modulate Puma-mediated Apoptosis

Glycogen synthase kinase 3 $\beta$  (GSK3 $\beta$ ) has been found to play a pro-apoptotic role in several models of neuronal apoptosis (reviewed in [8]) including potassium withdrawal in CGNs [52,53]. GSK3 $\beta$  activity is known to be inhibited by AKT mediated serine-9 phosphorylation and inactivation of AKT results in GSK3 $\beta$  activation associated with serine-9 dephosphorylation [22]. Indeed we find that GSK3 $\beta$  serine-9 phosphorylation is decreased in potassium deprived neurons consistent with its activation, and that IGF-1 prevents this dephosphorylation/activation (Figure 5A). Similarly, we find that direct inhibition of PI3K/AKT by LY294002 is sufficient to induce GSK3 $\beta$ -dephosphorylation/activation (Figure 6A). Therefore, we investigated whether GSK3 $\beta$  activation may link AKT inactivation to Puma induction and neuronal cell death. To address this we examined Puma expression in CGNs deprived of potassium in the presence of the GSK3 $\alpha/\beta$  inhibitor SB415286 or the GSK3 $\beta$  selective

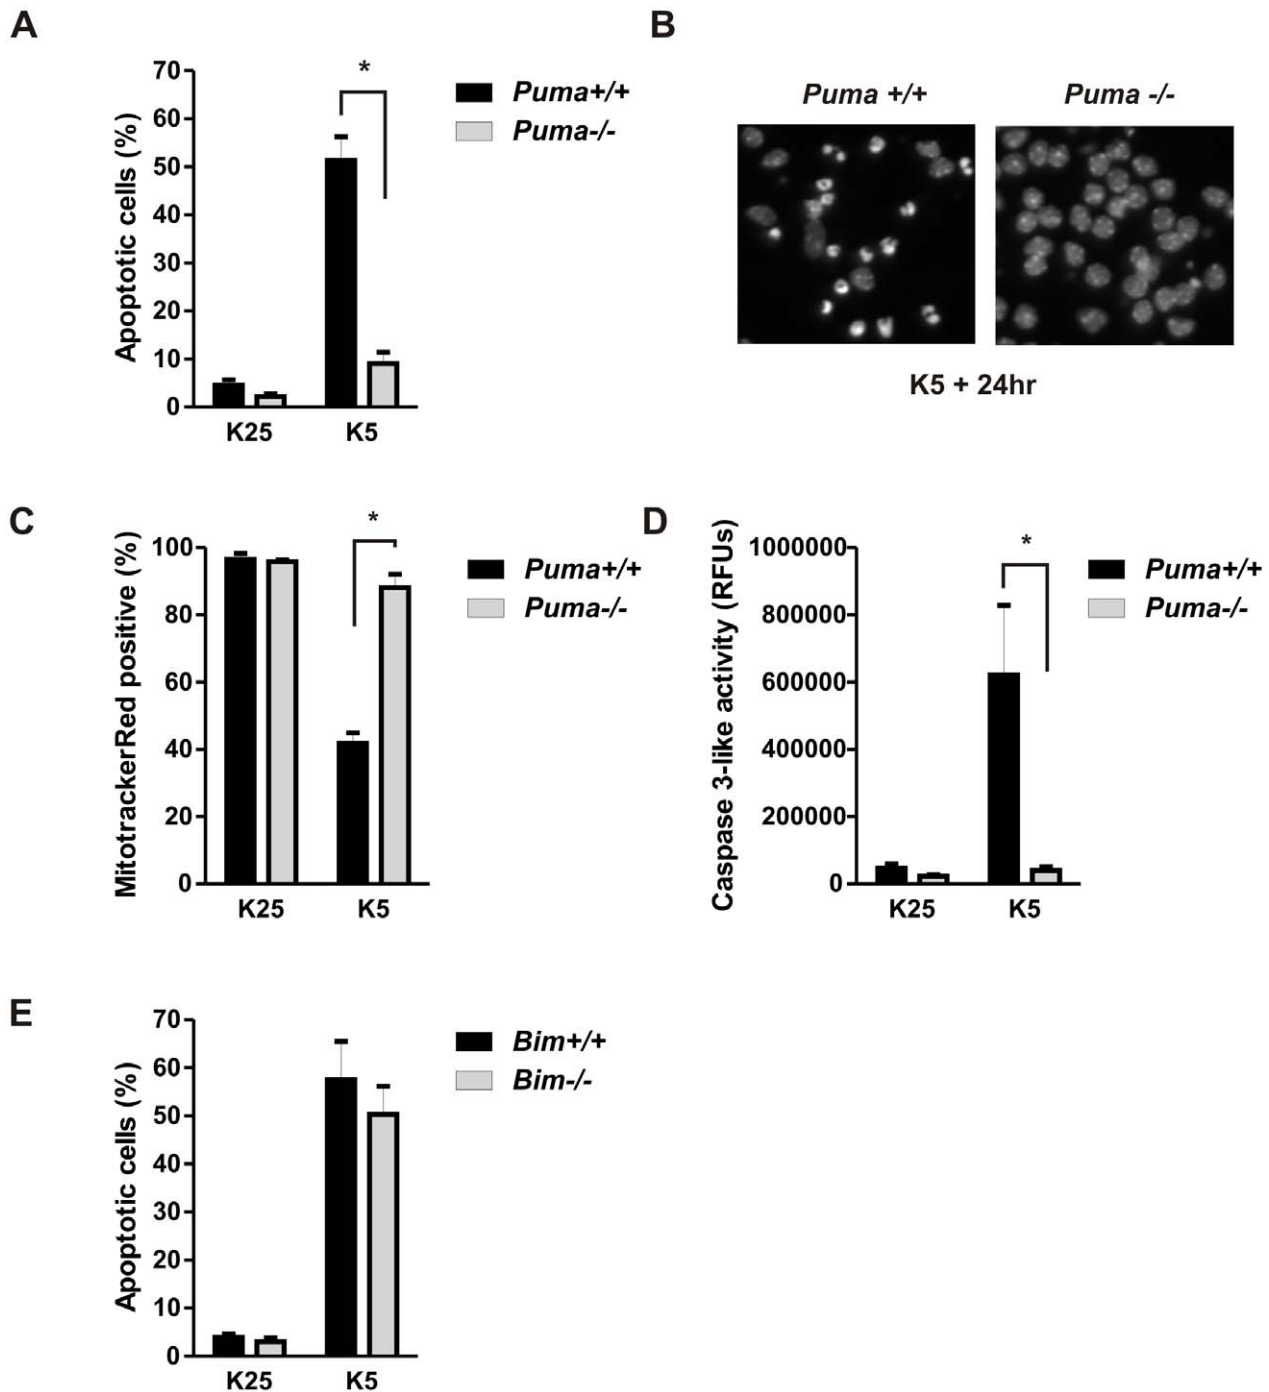

**Figure 2. Puma is essential for potassium-withdrawal induced apoptosis in CGNs.** CGNs derived *Puma*<sup>+/+</sup> and *Puma*<sup>-/-</sup> littermates were maintained in high potassium medium (K25) or switched to low potassium medium (K5). **A**, The fraction of apoptotic cells was determined at 24 h by assessing nuclear morphology following Hoechst staining of *Puma*<sup>+/+</sup> vs *Puma*<sup>-/-</sup> CGNs (n=7, \*p<0.01). **B**, Representative images of Hoechst stained wild type and *Puma*-deficient neurons 24 hours following potassium withdrawal. **C**, CGNs were stained with Mitotracker Red to assess mitochondrial membrane potential. The fraction of Mitotracker Red labeled neurons was determined 20 hours after potassium withdrawal and compared between genotypes (n=4, \*p<0.05). **D**, Cell lysates were collected 20 hours after potassium withdrawal and assayed for caspase-3-like activity. Caspase activity is reported as relative fluorescence units of cleaved caspase substrate and was compared between genotypes (n=4, \*p<0.05). **E**, CGNs derived from *Bim*<sup>+/+</sup> and *Bim*<sup>-/-</sup> littermates were maintained in high potassium medium or switched to low potassium medium and the fraction of apoptotic cells was determined at 24 h (n=5). doi:10.1371/journal.pone.0046885.g002

inhibitor AR-A014418 [54,55]. As shown in Figures 7A and 7B, the induction of Puma mRNA and protein by potassium deprivation was significantly reduced by the GSK3 $\beta$  inhibitors.

GSK3 $\beta$  inhibition also significantly reduced the level of apoptosis induced by potassium deprivation (Figure 7C). We next examined the role of GSK3 $\beta$  in Puma expression and cell death induced by



**A**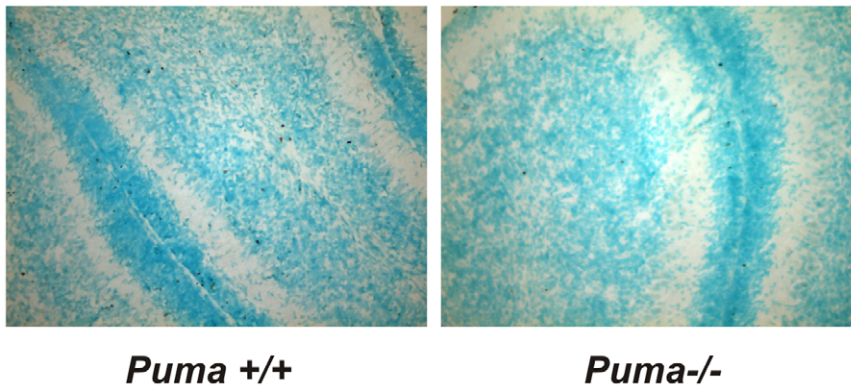**B**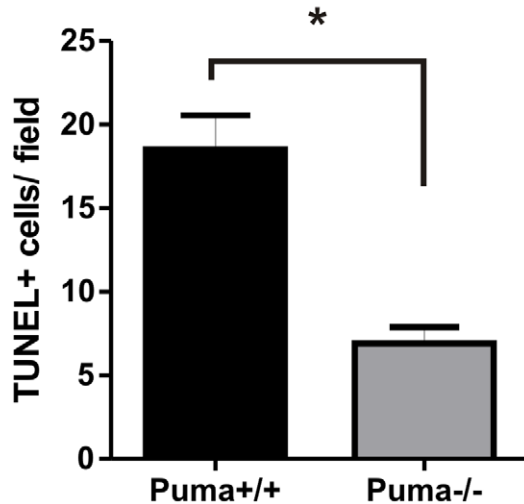

**Figure 3. Puma contributes to CGN apoptosis during postnatal development *in vivo*.** Sagittal sections from the cerebellum of postnatal day 7 Puma<sup>+/+</sup> and Puma<sup>-/-</sup> mice were TUNEL stained to detect apoptotic cells. A, Representative images showing TUNEL labeling (brown DAB+ cells) of cerebellar sections from Puma<sup>+/+</sup> and Puma<sup>-/-</sup> mice. B, The mean number of TUNEL positive cells in the internal granule layer (IGL) per field was determined for each animal and the data is presented as the mean  $\pm$  SEM for Puma<sup>+/+</sup> and Puma<sup>-/-</sup> mouse pups (n=4 mice of each genotype, \*p<0.05). doi:10.1371/journal.pone.0046885.g003

LY294002 mediated PI3K/AKT inactivation. Inhibition of GSK3 $\beta$  by the SB415286 compound abolished LY294002 induced Puma mRNA and protein (Figures 8A and 8B) as well as LY induced apoptosis (Figure 8C). Taken together these results suggest that AKT inactivation triggers Puma induction and neuronal apoptosis via a GSK3 $\beta$ -dependent mechanism.

#### The JNK and AKT-GSK3 $\beta$ Pathways Converge to Regulate FoxO3a Mediated Transcriptional Induction of Puma

Having established a requirement for both the JNK and AKT/GSK3 $\beta$  pathways in Puma induction we next examined whether these signaling pathways were co-dependent or signaling independently of one another. We found that inhibition of GSK3 did not affect the potassium withdrawal induced upregulation of downstream JNK targets including P-c-Jun, P-ATF2 and ATF3 implying that JNK signaling is not dependent on GSK3 $\beta$  activity

(Figure 9A). Furthermore, JNK downstream targets are not affected by AKT signaling independently of GSK3 $\beta$  as their induction is not affected by AKT activation by IGF-1 (Figure 9B). Finally, we find that AKT and GSK3 $\beta$  phosphorylation levels are not affected by SP600125 mediated JNK inhibition suggesting that JNK is not indirectly modulating the activity of the AKT/GSK3 $\beta$  pathway (Figure 9C). Taken together these results suggest that the JNK and AKT/GSK3 $\beta$  pathways function independently of one another during potassium withdrawal in CGNs.

The transcription factor FoxO3a is known to be inactivated via phosphorylation by AKT [78]. Furthermore, FoxO3a has been implicated in the regulation of Puma expression in growth factor withdrawal induced apoptosis of lymphoid cells [80]. Therefore, we examined whether FoxO3a is required for Puma induction in potassium deprivation induced apoptosis of CGNs. Consistent with the decrease in AKT activity we found that FoxO3a (Thr-32)

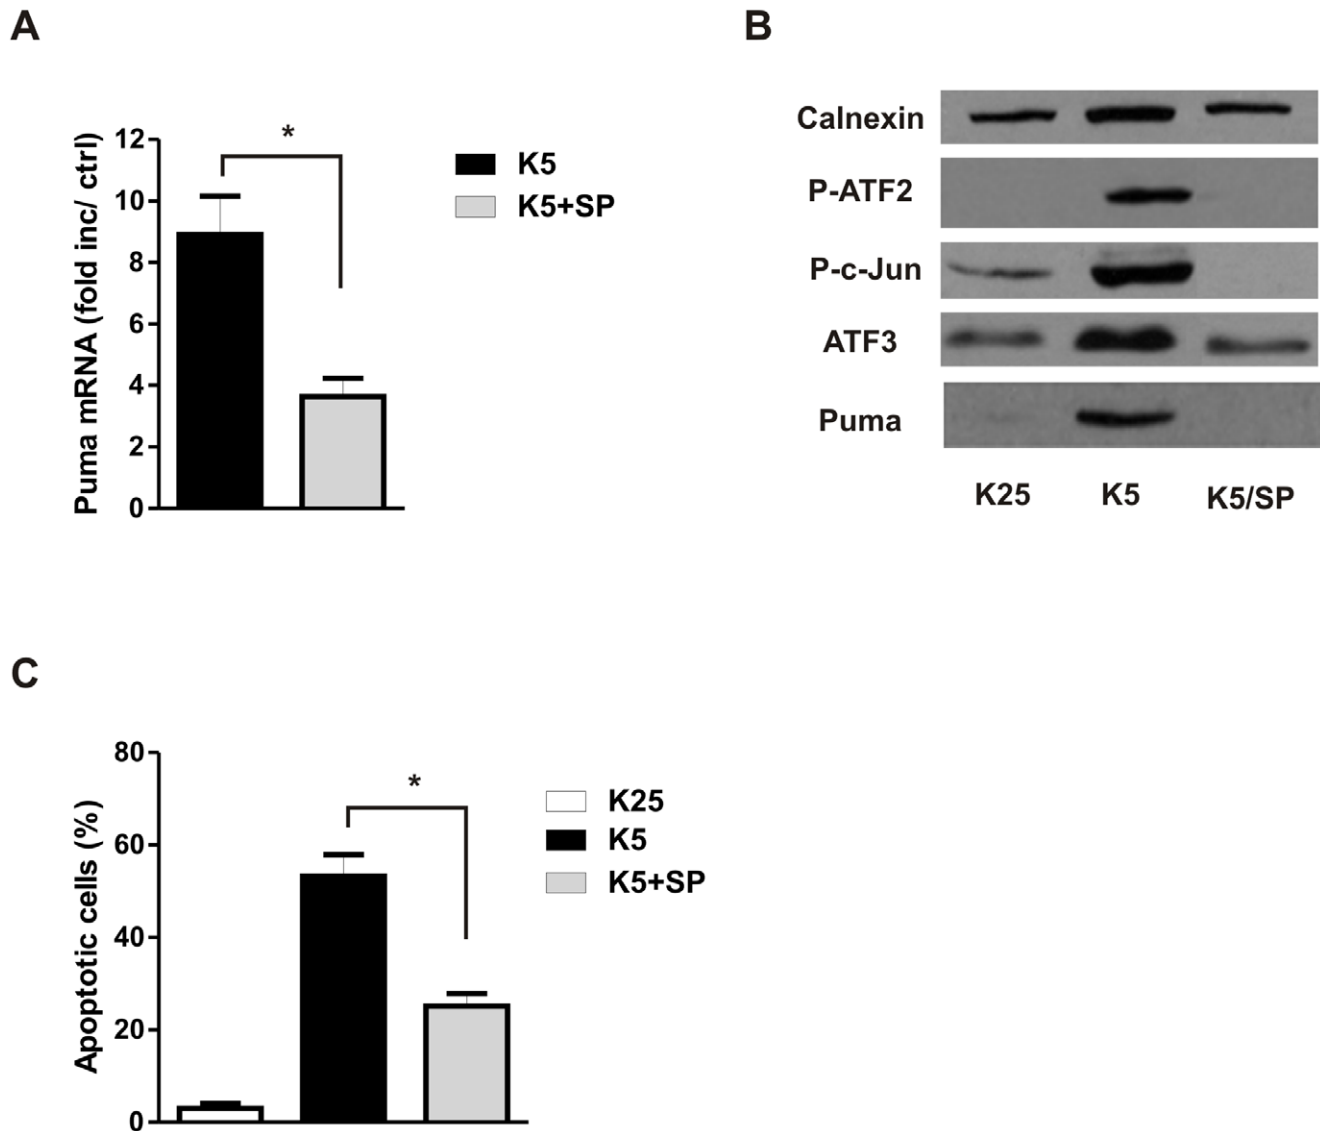

**Figure 4. JNK is required for Puma induction and potassium withdrawal induced neuronal apoptosis.** After 7 days in culture CGNs were either maintained in high potassium medium or switched to low potassium medium with or without 10  $\mu$ M SP600125 (SP). **A**, Puma mRNA levels were assessed by qRT-PCR 6 hours after potassium withdrawal and are reported as fold increase over K25 controls ( $n=7$ ,  $*p<0.05$ ). **B**, Protein extracts were collected 8 hours after potassium withdrawal and Phospho-ATF2, Phospho-c-Jun, ATF3 and Puma protein levels were assessed by western blot. Calnexin was included as a loading control. **C**, The fraction of apoptotic neurons was determined 24 hours after potassium withdrawal by examining nuclear morphology in Hoechst stained cells ( $n=5$ ,  $*p<0.05$ ). doi:10.1371/journal.pone.0046885.g004

phosphorylation was reduced in CGNs following potassium deprivation (Figure 10A). To determine whether FoxO3a is required for Puma induction in this paradigm, we transduced CGNs with lentivirus expressing shRNA targeting FoxO3a or a non-targeting shRNA as a control. As shown in Figures 10B and 10C, FoxO3a knockdown resulted in a significant decrease in Puma mRNA induction in response to potassium withdrawal suggesting that FoxO3a contributes to Puma induction in trophic factor deprived CGNs. We next examined whether AKT, GSK3 $\beta$  and JNK signaling affected potassium deprivation induced FoxO3a dephosphorylation/activation. Consistent with its ability to promote AKT activation, IGF-1 suppressed the potassium deprivation induced dephosphorylation of FoxO3a. Interestingly, however, we found that inhibition of either JNK or GSK3 also attenuated potassium deprivation induced FoxO3a dephosphory-

lation/activation (Figure 10D). These results suggest that JNK and GSK3 $\beta$  signaling are also required for potassium deprivation induced FoxO3a activation although the mechanism remains unclear.

In summary, we have established a novel link between kinase pathways and the transcriptional activation of the Bcl-2 family protein Puma that is critical for the execution of neuronal apoptosis. We propose a model in which the JNK and AKT/GSK3 $\beta$  pathways are activated independently and converge to regulate transcription factors including FoxO3a that mediate transcriptional induction of Puma which in turn promotes Bax activation and neuronal cell death.

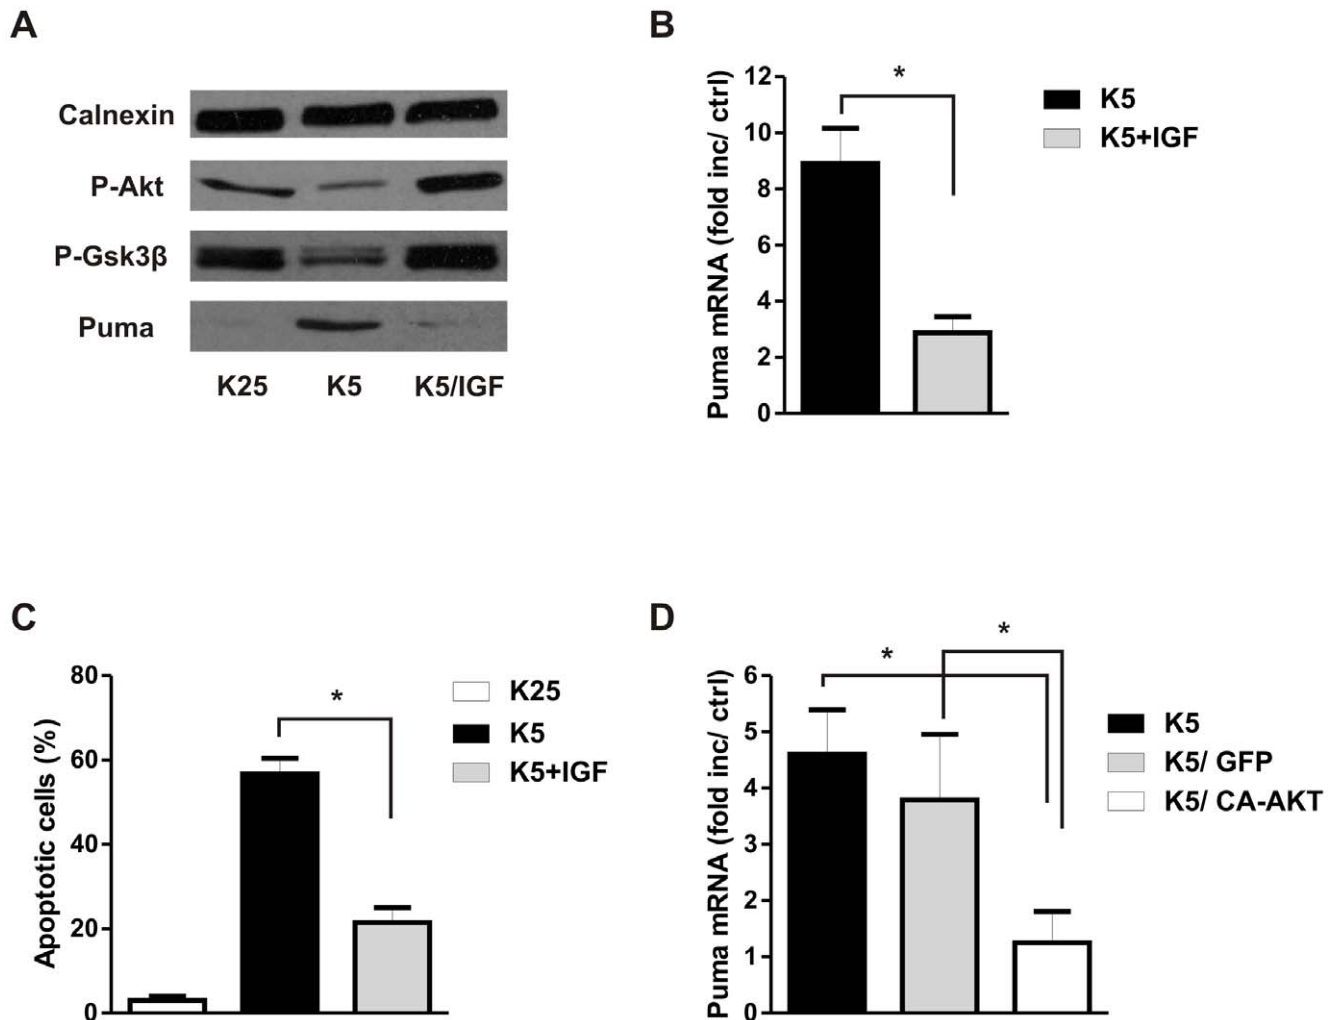

**Figure 5. Activation of the AKT pathway inhibits potassium withdrawal induced Puma expression and neuronal apoptosis.** CGNs were maintained in high potassium medium or switched to low potassium medium with or without 200 nM IGF-1. **A**, Protein extracts were collected 8 hours after potassium withdrawal and Phospho-AKT, Phospho-GSK3 $\beta$  and Puma protein levels were assessed by western blot. **B**, RNA was collected 6 hours after potassium withdrawal and Puma mRNA levels were quantified by qRT-PCR. Puma expression is reported as fold increase over K25 controls (n = 4, \*p < 0.05). **C**, Neurons were Hoechst stained 24 hours after potassium withdrawal in the presence or absence of IGF-1 (200 nM) and the fraction of apoptotic cells was determined by examining nuclear morphology (n = 4, \*p < 0.05). **D**, CGNs were infected with adenovirus expressing either GFP or a constitutively active form of AKT (CA-AKT) at 10 MOI and seven days later cells were switched to low potassium medium to induce apoptosis. RNA was collected 6 hours after potassium withdrawal and Puma transcript levels were quantified by qRT-PCR. Puma mRNA levels are reported as fold increase over K25 controls (n = 3, \*p < 0.05). doi:10.1371/journal.pone.0046885.g005

## Discussion

Apoptosis has been implicated in the progression of acute and chronic neurodegenerative conditions such as stroke, spinal cord injury, Alzheimer's disease, Parkinson's disease and Huntington's disease. Several kinases have been implicated in the regulation of neuronal apoptosis including AKT, GSK3 and JNK family kinases. The AKT pathway has been found to promote cell survival in many neuronal cell types [22,35,56–59] while inhibition of AKT signaling has been shown to promote neuronal cell death [20,23,35]. In contrast, the GSK3 $\beta$  and JNK family kinases are known to function to promote cell death in several types of neurons and inhibition or knockdown of these kinases protects neurons from a variety of apoptotic stimuli [11,14,60–64]. While it is well established that these kinases play a key role in determining neuronal survival the mechanisms by which they regulate the apoptotic machinery remains unclear. Importantly, in

the present study we have demonstrated that the AKT, GSK3 $\beta$  and JNK signaling pathways converge to regulate the transcriptional induction of the pro-apoptotic Bcl-2 family member Puma. Furthermore we demonstrate that induction of Puma by these kinase pathways is a critical determinant of apoptosis in cerebellar granule neurons both *in vitro* and *in vivo*.

The Bcl-2 family proteins are critical mediators of apoptosis and several studies have demonstrated that the multi-domain pro-apoptotic member Bax is essential for the execution of apoptosis in diverse neuronal death paradigms [26–30,65,66]. It is now recognized that the BH3-only subfamily of Bcl-2 proteins play a key role in activating Bax in response to apoptotic stimuli making them likely candidates for kinase mediated regulation [67]. The BH3-only family consists of multiple members and indeed several of these have been shown to be affected by AKT and JNK signaling. For example, AKT has been reported to phosphorylate Bad resulting in its sequestration



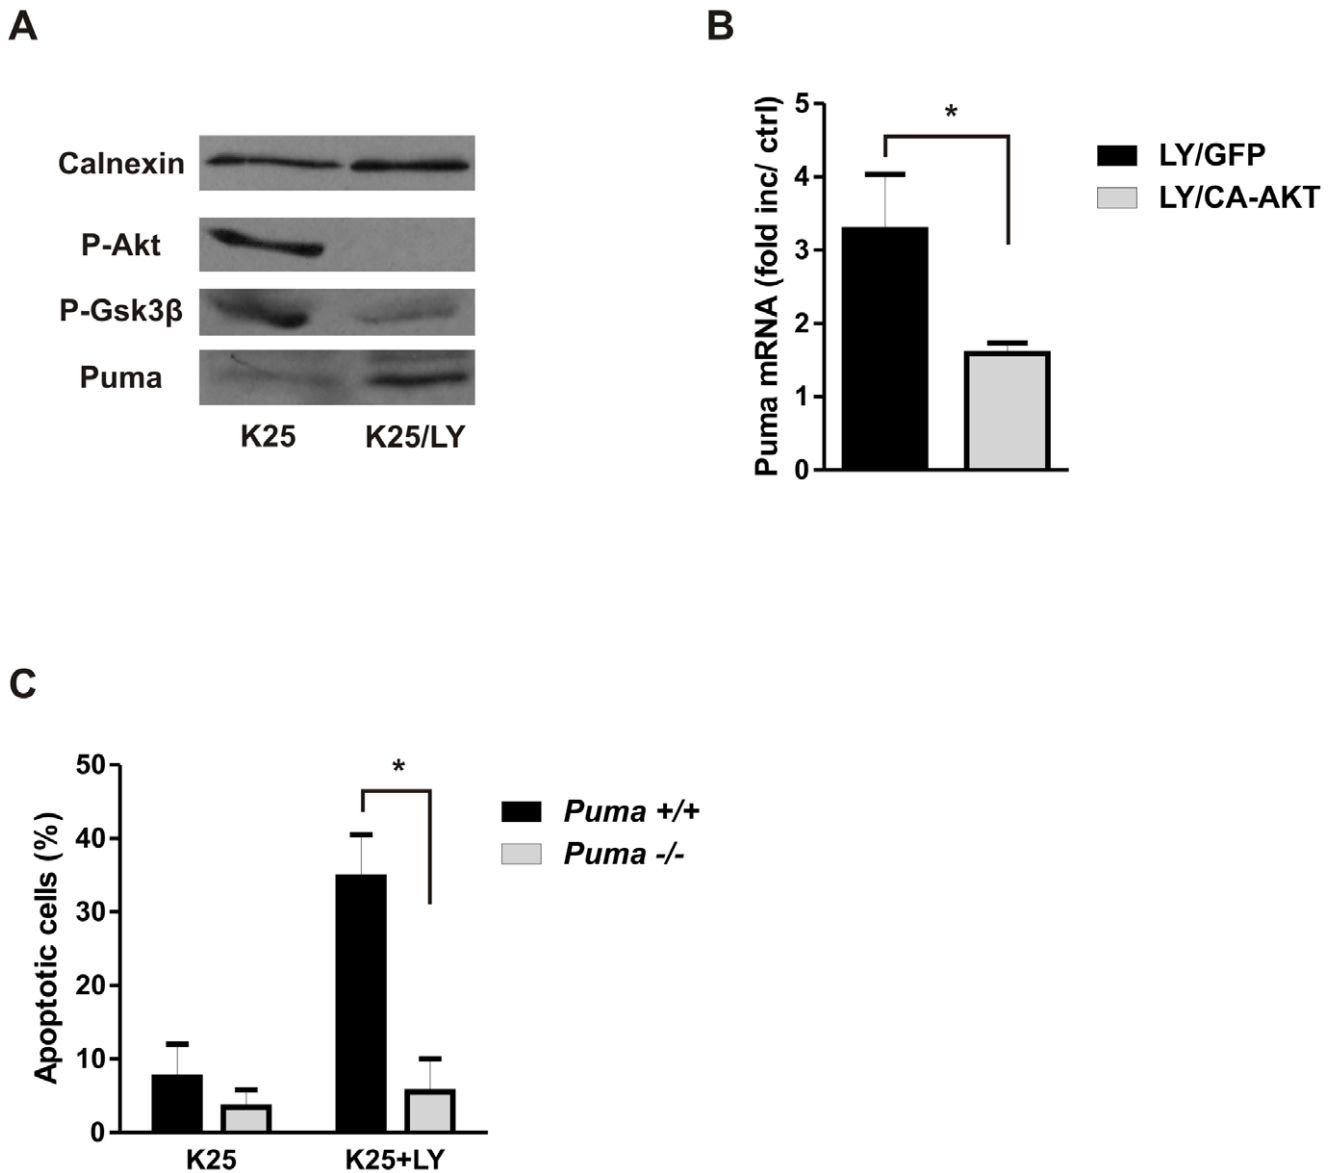

**Figure 6. PI3K/AKT inhibition induces Puma expression and Puma-dependent apoptosis in CGNs.** **A**, CGNs maintained in high potassium medium (K25) were treated with the PI3K inhibitor LY294002 (30  $\mu$ M) or vehicle and protein extracts were collected after 12 hours and Phospho-AKT, Phospho-GSK3 $\beta$  and Puma protein levels were assessed by western blot. **B**, CGNs were infected with recombinant adenovirus expressing either CA-AKT or GFP at 10 MOI and after 7 days neurons were treated with or without LY294002 (30  $\mu$ M). RNA was collected at 8 hours and Puma mRNA levels were quantified by qRT-PCR (n = 4, \*p < 0.05). **C**, CGNs derived from *Puma*<sup>+/+</sup> and *Puma*<sup>-/-</sup> littermates were treated with or without 30  $\mu$ M LY294002 (LY) and the fraction of apoptotic neurons was quantified after 24 hours by Hoechst staining. doi:10.1371/journal.pone.0046885.g006

by protein 14-3-3 and inhibiting its ability to induce apoptosis [68,69]. Similar to our results with Puma, it has been reported that AKT upregulation by IGF-1 can suppress the transcriptional induction of Bim in potassium deprived CGNs [70]. Furthermore, it has been shown that JNK inhibition can block transcriptional induction of the BH3-only members Bim and Hrk/DP5 in trophic factor deprived neurons [44,71,72]. The role of Hrk/DP5 in trophic factor deprivation induced neuronal apoptosis appears to be neuronal subtype dependent as apoptosis is not reduced in Hrk/DP5-deficient CGNs subjected to potassium deprivation, but is partially reduced in superior cervical ganglia cells following nerve growth factor withdrawal [73]. Similarly, it has previously been reported that trophic factor deprivation induced apoptotic cell death is significantly reduced in Bim-deficient neurons [71]. However, we have found that

potassium deprivation induced apoptosis is only modestly reduced in Bim-deficient CGNs. On the other hand we have determined that Puma plays a major role in regulating trophic factor deprivation induced apoptosis in CGNs both *in vitro* and *in vivo*. Furthermore, Puma-deficient neurons have been shown to be remarkably resistant to the induction of apoptosis by diverse stimuli including DNA damage, oxidative stress, ER stress/dysfunction, and proteasome inhibition [30,46,47,50]. In addition, Puma-deletion has been shown to be neuroprotective in mouse models of severe *status epilepticus* and Amyotrophic Lateral Sclerosis [49,51].

We have determined that inhibition of either JNK or GSK3 $\beta$  markedly reduces Puma induction and cell death suggesting that simultaneous activation of both pathways is required for Puma induction. Furthermore, our results suggest that these pathways

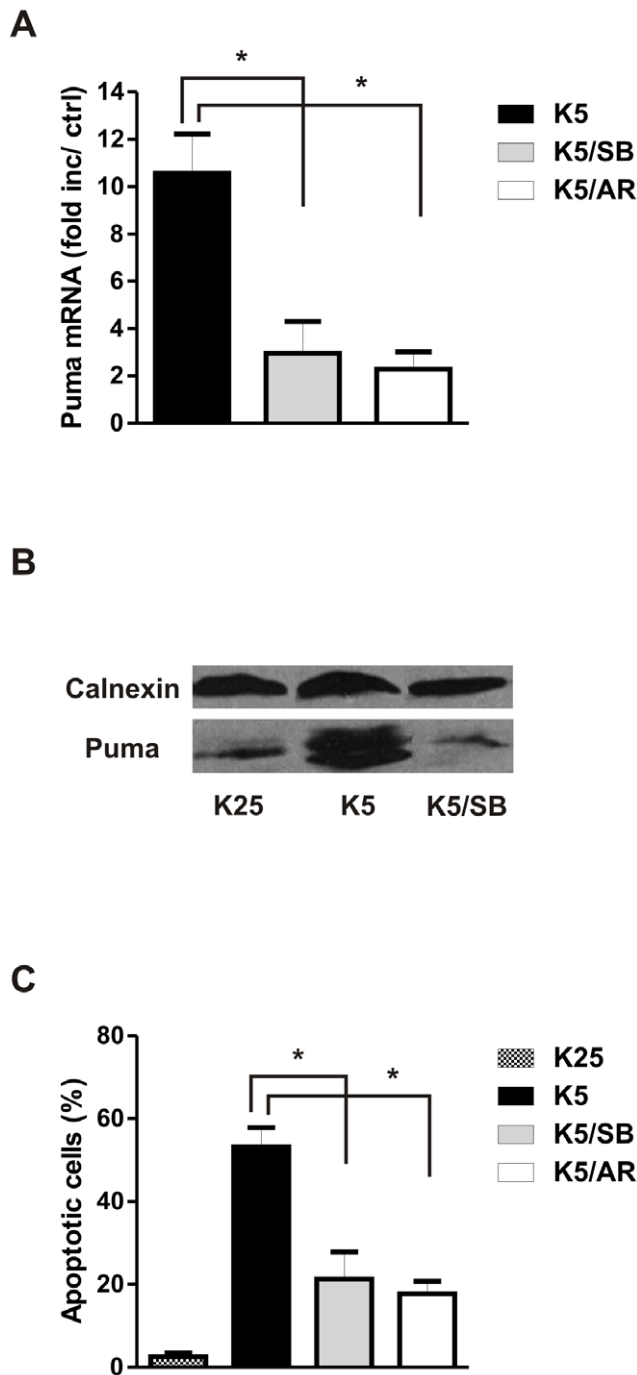

**Figure 7. GSK3 $\beta$  is required for Puma induction in potassium withdrawal induced apoptosis.** CGNs were switched to low potassium medium in the presence or absence of the GSK3 $\alpha/\beta$  inhibitor SB415286 (SB, 30  $\mu$ M) or the GSK3 $\beta$  specific inhibitor AR-A01 4418 (AR, 50  $\mu$ M). **A**, RNA was collected six hours after potassium withdrawal and analyzed for Puma mRNA expression using qRT-PCR (n=4, \*p<0.05). **B**, Protein extracts were collected 8 hours after potassium withdrawal and Puma protein levels were analyzed by western blot. **C**, The fraction of apoptotic neurons was quantified after 24 hours by Hoechst staining (n=3, \*p<0.05). doi:10.1371/journal.pone.0046885.g007

are functioning independently and converge to regulate Puma transcription. Specifically we have determined that suppression of the AKT/GSK3 $\beta$  pathway by either IGF-1 mediated AKT

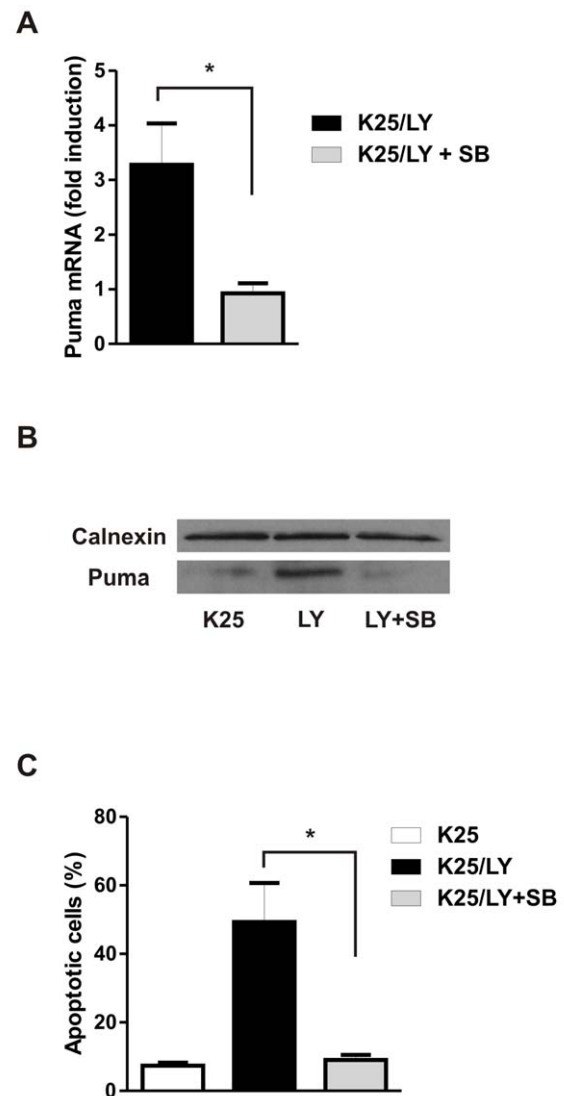

**Figure 8. AKT inactivation induces Puma expression and neuronal apoptosis via a GSK3 $\beta$ -dependent mechanism.** CGNs maintained for 7 days in high potassium medium were treated with or without the PI3K inhibitor LY294002 (30  $\mu$ M, LY) in the presence or absence of the GSK3 $\beta$  inhibitor SB415286 (30  $\mu$ M, SB). **A**, RNA was collected 8 hours post treatment and Puma mRNA levels were determined by qRT-PCR (n=3, \*p<0.05). **B**, Protein extracts were collected 12 hours post-treatment and Puma protein levels were analyzed by western blot. **C**, The fraction of apoptotic neurons was quantified after 24 hours by Hoechst staining (n=3, \*p<0.05). doi:10.1371/journal.pone.0046885.g008

activation or pharmacological inhibition of GSK3 $\beta$  does not affect the induction of JNK targets including P-c-Jun, P-ATF2 or ATF3. Similarly, we find that inhibition of JNK does not affect AKT activity as it does not appear to influence AKT mediated GSK3 $\beta$  (ser-9) phosphorylation. However, we cannot rule out the possibility that JNK could indirectly modulate GSK3 $\beta$  activity independently of AKT. Interestingly, we found that prolonged inactivation of the PI3K-AKT pathway by LY294002 was sufficient to induce Puma expression and neuronal cell death. However, we found that cell death induced by LY294002 was inhibited by the JNK inhibitor SP600125 (data not shown) suggesting that basal levels of JNK activity may be contributing to Puma induction in this context. This would be consistent with the

**A**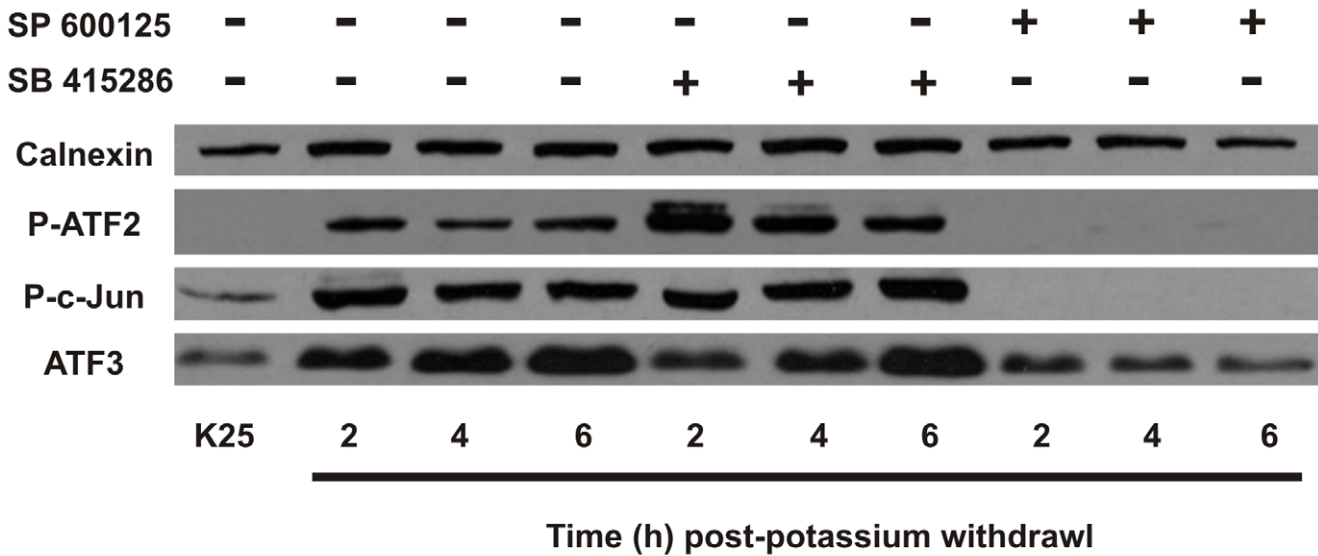**B**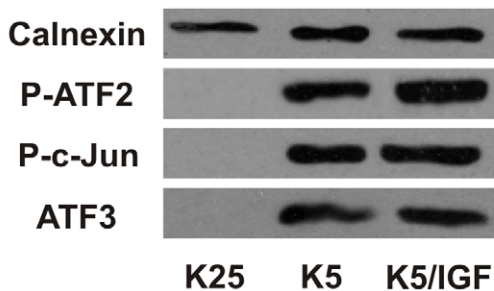**C**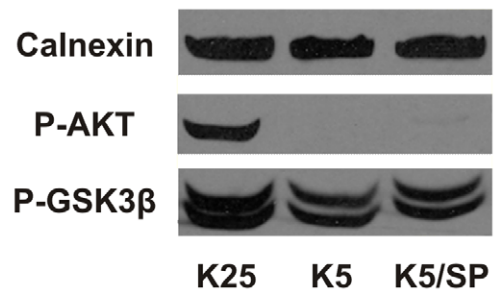

**Figure 9. The JNK and AKT/GSK3 $\beta$  pathways signal independently during potassium withdrawal in CGNs.** **A**, CGNs were maintained in high potassium medium (K25) or subjected to potassium withdrawal (K5) in the presence or absence of the JNK inhibitor SP600125 (10  $\mu$ M) or the GSK3 $\beta$  inhibitor SB415286 (30  $\mu$ M). Protein extracts were collected at 2, 4 and 6 hours and Phospho-ATF2, Phospho-c-Jun and ATF3 levels were analyzed by western blot. **B**, CGNs were subjected to potassium withdrawal in the presence or absence of 200 nM IGF-1. Protein extracts were collected after 6 hours and were analyzed for Phospho-ATF2, Phospho-c-Jun and ATF3 protein levels by western blot. **C**, CGNs were subjected to potassium withdrawal in the presence or absence of 10  $\mu$ M SP600125 (SP) and protein extracts were collected after 6 hours and analyzed by western blot for Phospho-AKT and Phospho-GSK3 $\beta$  levels. doi:10.1371/journal.pone.0046885.g009

lower levels of Puma induction and cell death observed following LY294002 mediated PI3K/AKT inactivation as compared with potassium withdrawal. Our finding that activation of both the AKT/GSK3 $\beta$  and JNK pathways is required to control Puma induction suggests a signaling cascade which has a built-in safety mechanism to prevent spontaneous neuronal apoptosis.

The activation of Puma mRNA induction provides the convergence point of these kinase signaling pathways, however, the exact mechanism by which they converge on Puma induction remains to be determined. As Puma is regulated at the transcriptional level it seems logical that these kinases alter the activity of transcriptional repressors or activators which in turn

control Puma expression. Puma was originally identified as a target gene of the transcription factor p53, and indeed our laboratory, as well as others have demonstrated that Puma is an essential pro-apoptotic factor in p53-mediated neuronal apoptosis [50,74,75]. However, Puma has been shown in many cases to be induced independently of p53 (reviewed in [76]), and it is unlikely that p53 contributes to Puma induction in this model as it has previously been demonstrated that p53 is not required for potassium withdrawal induced apoptosis in CGNs [77]. As such, we expected that other transcription factors, downstream of the AKT/GSK3 $\beta$  and JNK pathways, would be responsible for Puma upregulation following potassium deprivation in CGNs. Previous studies have

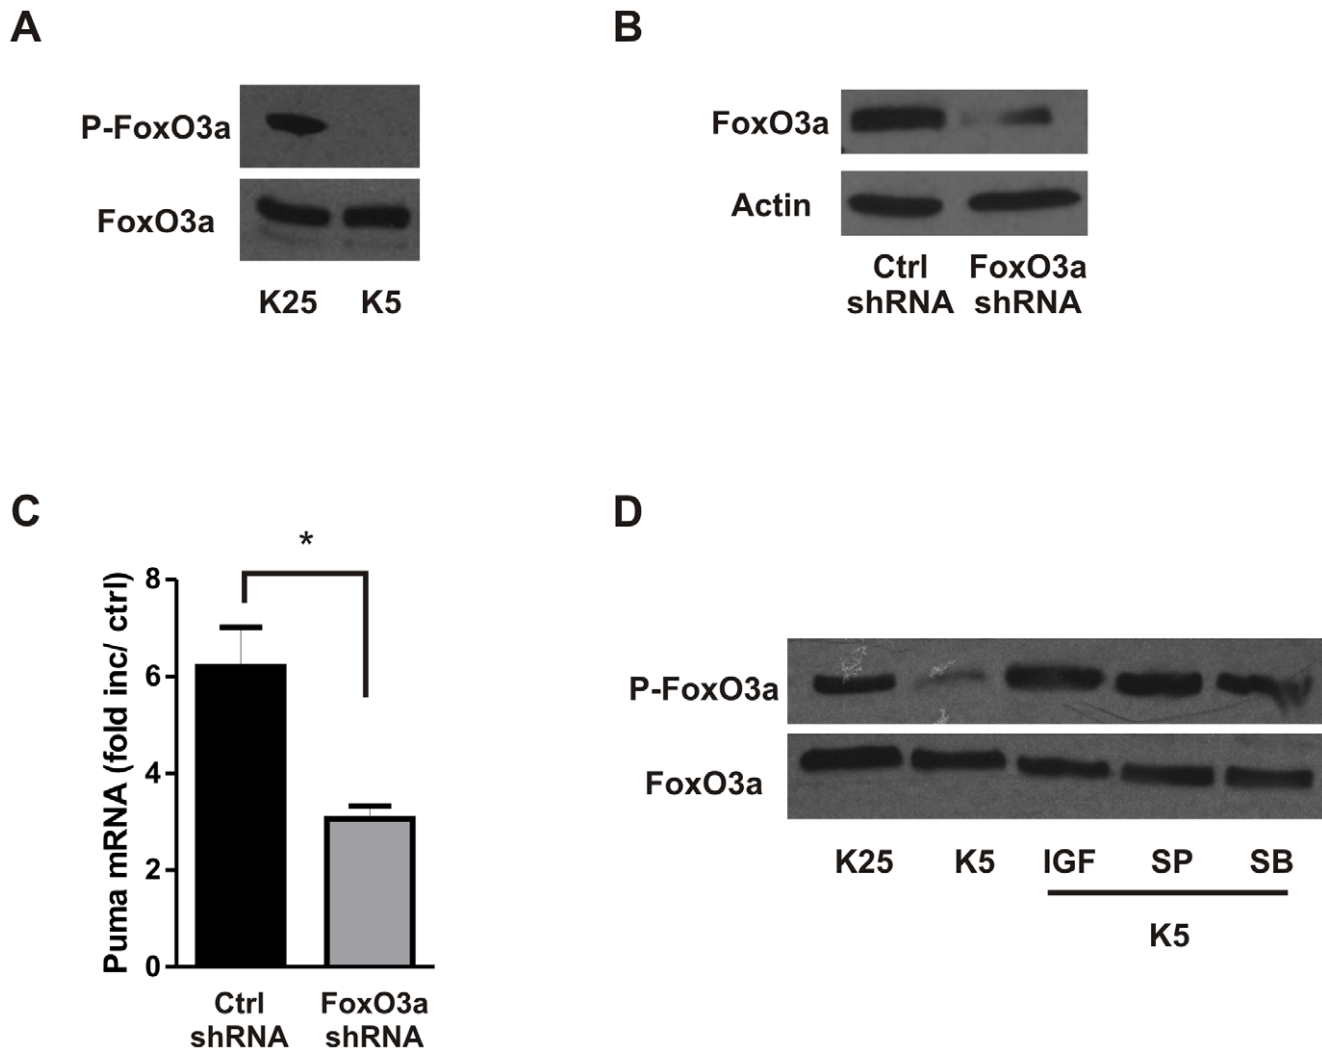

**Figure 10. FoxO3a regulates Puma induction in potassium deprived CGNs.** **A**, CGNs were maintained in high potassium (K25) or subjected to potassium withdrawal (K5). Protein extracts were collected at 8 hours and Phospho(Thr32)-FoxO3a and total FoxO3a levels were analyzed by western blot. **B**, CGNs were transduced with lentivirus (1 MOI) expressing shRNA directed against FoxO3a or a non-targeting control shRNA and FoxO3a protein levels were analyzed by western blot at 7 days post-infection. **C**, Puma mRNA levels were measured by qRT-PCR following 8 hours of potassium deprivation in CGNs transduced with FoxO3a-shRNA or non-targeting control shRNA ( $n=3$ ;  $*p<0.05$ ). **D**, Phospho(Thr32)-FoxO3a and total FoxO3a protein was analyzed by western blot in CGNs maintained in high potassium (K25) or subjected to potassium deprivation for 8 hours in the presence or absence of either IGF-1 (200 nM), SP600125 (10  $\mu$ M) or SB415286 (30  $\mu$ M).  
doi:10.1371/journal.pone.0046885.g010

implicated the transcription factor FoxO3a in trophic factor deprivation induced neuronal cell death [70,79]. Importantly, we demonstrate that FoxO3a promotes neuronal apoptosis through the transcriptional induction of Puma. Similar to our results it has previously been reported that FoxO3a can activate Puma transcription and apoptosis in cytokine-deprived lymphoid cells [80]. The nuclear localization and transcriptional activity of FoxO3a is negatively regulated by AKT-mediated phosphorylation. Consistent with this we found that IGF-1 prevented the potassium deprivation induced decrease in AKT activity, FoxO3a dephosphorylation and attenuated Puma induction. Interestingly, we found that inhibition of either JNK or GSK3 $\beta$  also inhibited FoxO3a dephosphorylation/activation. These results were surprising given that GSK3 $\beta$  is activated downstream of AKT and that JNK signaling does not appear to affect AKT activity in this context (Figure 9C). This suggests that JNK and GSK3 $\beta$  can regulate FoxO3a phosphorylation by an indirect mechanism or via

an AKT-independent mechanism perhaps by regulating the activity of a phosphatase involved in FoxO3a dephosphorylation.

Although JNK and GSK3 $\beta$  were found to affect FoxO3a activation we cannot rule out the possibility that they may also regulate other transcription factors involved in Puma induction. A candidate factor downstream of GSK3 $\beta$  is nuclear factor of activated T cells (NFAT) which has been shown to be phosphorylated by GSK3 $\beta$  resulting in its export from the nucleus and promotion of survival in CGNs [81,82]. In this case NFAT may act as a repressor of Puma transcription which is removed upon GSK3 $\beta$  activation. Similarly, beta-catenin may be acting to suppress Puma induction until inactivated by GSK3 $\beta$ . Phosphorylation of beta-catenin by GSK3 $\beta$  causes its translocation out of the nucleus and targets it for degradation and inhibition of this phosphorylation event has been associated with neuronal survival [83,84]. Finally, there are several downstream targets of the JNK pathway which could control Puma expression following JNK

activation, these include c-Jun, activating transcription factor 2 (ATF2) and activating transcription factor 3 (ATF3). A main downstream target of JNK, c-Jun has been found to be upregulated in trophic factor deprived neurons and ectopic expression of dominant negative c-Jun was found to protect against cell death [64,85–87]. The JNK regulated transcription factors ATF2 and ATF3 are also induced in response to potassium deprivation and it has been reported that knockdown or inhibition of these factors can protect neurons against apoptosis [88,89]. It is noteworthy that the Puma promoter contains putative AP1 binding sites which are the known target sequence for all three of these transcription factors, suggesting a potential role for these factors in Puma induction. Interestingly, a recent study implicated c-Jun in the regulation of Puma expression in fatty acid induced apoptosis of hepatocytes [90], although the AP-1 binding site identified in this study does not appear to be conserved. While these transcription factors have been implicated in neuronal

apoptosis it is unclear whether or not they play a role in Puma upregulation in this context and is currently under investigation.

In summary, we have delineated a key pathway involved in the regulation of apoptosis induced by potassium deprivation in CGNs. Cell death in this paradigm results from the loss of activity dependent survival signals which is believed to mimic aspects of synaptic dysfunction common to many neuronal injury and neurodegenerative conditions. Therefore, in future studies it will be important to investigate the role of this pathway in *in vivo* models of neuronal injury and neurodegenerative diseases and to explore the therapeutic potential of targeting this pathway.

## Author Contributions

Conceived and designed the experiments: SPC KAA KBP SSF. Performed the experiments: KAA KBP MK AH. Analyzed the data: SPC KAA KBP. Contributed reagents/materials/analysis tools: SSF. Wrote the paper: SPC KAA KBP.

## References

- Mochizuki H, Goto K, Mori H, Mizuno Y (1996) Histochemical detection of apoptosis in Parkinson's disease. *J Neurol Sci* 137: 120–123.
- Portera-Cailliau C, Hedreen JG, Price DL, Koliatsos VE (1995) Evidence for apoptotic cell death in Huntington disease and excitotoxic animal models. *J Neurosci* 15: 3775–3787.
- Smale G, Nichols NR, Brady DR, Finch CE, Horton WE Jr (1995) Evidence for apoptotic cell death in Alzheimer's disease. *Exp Neurol* 133: 225–230.
- Crowe MJ, Bresnahan JC, Shuman SL, Masters JN, Beattie MS (1997) Apoptosis and delayed degeneration after spinal cord injury in rats and monkeys. *Nat Med* 3: 74–76.
- Vila M, Przedborski S (2003) Targeting programmed cell death in neurodegenerative diseases. *Nat Rev Neurosci* 4: 365–375.
- Brunet A, Datta SR, Greenberg ME (2001) Transcription-dependent and -independent control of neuronal survival by the PI3K-Akt signaling pathway. *Curr Opin Neurobiol* 11: 297–305.
- Borsello T, Forloni G (2007) JNK signalling: a possible target to prevent neurodegeneration. *Curr Pharm Des* 13: 1875–1886.
- Beurel E, Jope RS (2006) The paradoxical pro- and anti-apoptotic actions of GSK3 in the intrinsic and extrinsic apoptosis signaling pathways. *Prog Neurobiol* 79: 173–189.
- Mielke K, Herdegen T (2000) JNK and p38 stresskinases—degenerative effectors of signal-transduction-cascades in the nervous system. *Prog Neurobiol* 61: 45–60.
- Eilers A, Whitfield J, Shah B, Spadoni C, Desmond H, et al. (2001) Direct inhibition of c-Jun N-terminal kinase in sympathetic neurones prevents c-jun promoter activation and NGF withdrawal-induced death. *J Neurochem* 76: 1439–1454.
- Yang DD, Kuan CY, Whitmarsh AJ, Rincon M, Zheng TS, et al. (1997) Absence of excitotoxicity-induced apoptosis in the hippocampus of mice lacking the *Jnk3* gene. *Nature* 389: 865–870.
- Kuan CY, Whitmarsh AJ, Yang DD, Liao G, Schloemer AJ, et al. (2003) A critical role of neural-specific JNK3 for ischemic apoptosis. *Proc Natl Acad Sci U S A* 100: 15184–15189.
- Bhakar AL, Howell JL, Paul CE, Salehi AH, Becker EB, et al. (2003) Apoptosis induced by p75<sup>NTR</sup> overexpression requires Jun kinase-dependent phosphorylation of Bad. *J Neurosci* 23: 11373–11381.
- Hetman M, Cavanaugh JE, Kimelman D, Xia Z (2000) Role of glycogen synthase kinase-3 $\beta$  in neuronal apoptosis induced by trophic withdrawal. *J Neurosci* 20: 2567–2574.
- Takashima A, Noguchi K, Sato K, Hoshino T, Imahori K (1993) Tau protein kinase I is essential for amyloid beta-protein-induced neurotoxicity. *Proc Natl Acad Sci U S A* 90: 7789–7793.
- Eom TY, Roth KA, Jope RS (2007) Neural precursor cells are protected from apoptosis induced by trophic factor withdrawal or genotoxic stress by inhibitors of glycogen synthase kinase 3. *J Biol Chem* 282: 22856–22864.
- Linseman DA, Butts BD, Precht TA, Phelps RA, Le SS, et al. (2004) Glycogen synthase kinase-3 $\beta$  phosphorylates Bax and promotes its mitochondrial localization during neuronal apoptosis. *J Neurosci* 24: 9993–10002.
- Arboleda G, Cardenas Y, Rodriguez Y, Morales LC, Matheus L, et al. (2010) Differential regulation of AKT, MAPK and GSK3 $\beta$  during C2-ceramide-induced neuronal death. *Neurotoxicology* 31: 687–693.
- Lee JE, Kang JS, Ki YW, Lee SH, Lee SJ, et al. (2011) Akt/GSK3 $\beta$  signaling is involved in fipronil-induced apoptotic cell death of human neuroblastoma SH-SY5Y cells. *Toxicol Lett* 202: 133–141.
- Crowder RJ, Freeman RS (1998) Phosphatidylinositol 3-kinase and Akt protein kinase are necessary and sufficient for the survival of nerve growth factor-dependent sympathetic neurons. *J Neurosci* 18: 2933–2943.
- Alessi DR, Andjelkovic M, Caudwell B, Cron P, Morrice N, et al. (1996) Mechanism of activation of protein kinase B by insulin and IGF-1. *EMBO J* 15: 6541–6551.
- Dudek H, Datta SR, Franke TF, Birnbaum MJ, Yao R, et al. (1997) Regulation of neuronal survival by the serine-threonine protein kinase Akt. *Science* 275: 661–665.
- D'Mello SR, Borodez K, Soltoff SP (1997) Insulin-like growth factor and potassium depolarization maintain neuronal survival by distinct pathways: possible involvement of PI 3-kinase in IGF-1 signaling. *J Neurosci* 17: 1548–1560.
- Deshmukh M, Johnson EM Jr (1997) Programmed cell death in neurons: focus on the pathway of nerve growth factor deprivation-induced death of sympathetic neurons. *Mol Pharmacol* 51: 897–906.
- Youle RJ, Strasser A (2008) The BCL-2 protein family: opposing activities that mediate cell death. *Nat Rev Mol Cell Biol* 9: 47–59.
- Miller TM, Moulder KL, Knudson CM, Creedon DJ, Deshmukh M, et al. (1997) Bax deletion further orders the cell death pathway in cerebellar granule cells and suggests a caspase-independent pathway to cell death. *J Cell Biol* 139: 205–217.
- Xiang H, Kinoshita Y, Knudson CM, Korsmeyer SJ, Schwartzkroin PA, et al. (1998) Bax involvement in p53-mediated neuronal cell death. *J Neurosci* 18: 1363–1373.
- White FA, Keller-Peck CR, Knudson CM, Korsmeyer SJ, Snider WD (1998) Widespread elimination of naturally occurring neuronal death in Bax-deficient mice. *J Neurosci* 18: 1428–1439.
- Deckwerth TL, Elliott JL, Knudson CM, Johnson EM Jr, Snider WD, et al. (1996) BAX is required for neuronal death after trophic factor deprivation and during development. *Neuron* 17: 401–411.
- Steckley D, Karajgikar M, Dale LB, Fuerth B, Swan P, et al. (2007) Puma is a dominant regulator of oxidative stress induced Bax activation and neuronal apoptosis. *J Neurosci* 27: 12989–12999.
- Smith MI, Deshmukh M (2007) Endoplasmic reticulum stress-induced apoptosis requires bax for commitment and Apaf-1 for execution in primary neurons. *Cell Death Differ* 14: 1011–1019.
- Chang LK, Putcha GV, Deshmukh M, Johnson EM Jr (2002) Mitochondrial involvement in the point of no return in neuronal apoptosis. *Biochimie* 84: 223–231.
- Wolter KG, Hsu YT, Smith CL, Nechushtan A, Xi XG, et al. (1997) Movement of Bax from the cytosol to mitochondria during apoptosis. *J Cell Biol* 139: 1281–1292.
- Franklin JL, Johnson EM Jr (1992) Suppression of programmed neuronal death by sustained elevation of cytoplasmic calcium. *Trends Neurosci* 15: 501–508.
- Miller TM, Tansey MG, Johnson EM Jr, Creedon DJ (1997) Inhibition of phosphatidylinositol 3-kinase activity blocks depolarization- and insulin-like growth factor I-mediated survival of cerebellar granule cells. *J Biol Chem* 272: 9847–9853.
- Bjorkblom B, Vainio JC, Hongisto V, Herdegen T, Courtney MJ, et al. (2008) All JNKs can kill, but nuclear localization is critical for neuronal death. *J Biol Chem* 283: 19704–19713.
- Chin PC, Majdzadeh N, D'Mello SR (2005) Inhibition of GSK3 $\beta$  is a common event in neuroprotection by different survival factors. *Brain Res Mol Brain Res* 137: 193–201.
- Villunger A, Michalak EM, Coultas L, Mullaer F, Bock G, et al. (2003) p53- and drug-induced apoptotic responses mediated by BH3-only proteins puma and noxa. *Science* 302: 1036–1038.
- Bouillet P, Metcalf D, Huang DC, Tarlinton DM, Kay TW, et al. (1999) Proapoptotic Bcl-2 relative Bim required for certain apoptotic responses, leukocyte homeostasis, and to preclude autoimmunity. *Science* 286: 1735–1738.

40. Cregan SP, MacLaurin JG, Craig CG, Robertson GS, Nicholson DW, et al. (1999) Bax-dependent caspase-3 activation is a key determinant in p53-induced apoptosis in neurons. *J Neurosci* 19: 7860–7869.
41. Cregan SP, MacLaurin J, Gendron TF, Callaghan SM, Park DS, et al. (2000) Helper-dependent adenovirus vectors: their use as a gene delivery system to neurons. *Gene Ther* 7: 1200–1209.
42. Cregan SP, Fortin A, MacLaurin JG, Callaghan SM, Cecconi F, et al. (2002) Apoptosis-inducing factor is involved in the regulation of caspase-independent neuronal cell death. *J Cell Biol* 158: 507–517.
43. Schulz JB, Weller M, Klockgether T (1996) Potassium deprivation-induced apoptosis of cerebellar granule neurons: a sequential requirement for new mRNA and protein synthesis, ICE-like protease activity, and reactive oxygen species. *J Neurosci* 16: 4696–4706.
44. Harris CA, Johnson EM Jr (2001) BH3-only Bcl-2 family members are coordinately regulated by the JNK pathway and require Bax to induce apoptosis in neurons. *J Biol Chem* 276: 37754–37760.
45. Ma C, Ying C, Yuan Z, Song B, Li D, et al. (2007) dp5/HRK is a c-Jun target gene and required for apoptosis induced by potassium deprivation in cerebellar granule neurons. *J Biol Chem* 282: 30901–30909.
46. Galehdar Z, Swan P, Fuerth B, Callaghan SM, Park DS, et al. (2010) Neuronal apoptosis induced by endoplasmic reticulum stress is regulated by ATF4-CHOP-mediated induction of the Bcl-2 homology 3-only member PUMA. *J Neurosci* 30: 16938–16948.
47. Tuffly LP, Concannon CG, D'Orsi B, King MA, Woods I, et al. (2010) Characterization of Puma-dependent and Puma-independent neuronal cell death pathways following prolonged proteasomal inhibition. *Mol Cell Biol* 30: 5484–5501.
48. Fricker M, Papadia S, Hardingham GE, Tolkovsky AM (2010) Implication of TAp73 in the p53-independent pathway of Puma induction and Puma-dependent apoptosis in primary cortical neurons. *J Neurochem* 114: 772–783.
49. Kieran D, Woods I, Villunger A, Strasser A, Prehn JH (2007) Deletion of the BH3-only protein puma protects motoneurons from ER stress-induced apoptosis and delays motoneuron loss in ALS mice. *Proc Natl Acad Sci U S A* 104: 20606–20611.
50. Wyttenbach A, Tolkovsky AM (2006) The BH3-only protein Puma is both necessary and sufficient for neuronal apoptosis induced by DNA damage in sympathetic neurons. *Journal of Neurochemistry* 96: 1213–1226.
51. Engel T, Murphy BM, Hatazaki S, Jimenez-Mateos EM, Concannon CG, et al. (2010) Reduced hippocampal damage and epileptic seizures after status epilepticus in mice lacking proapoptotic Puma. *FASEB J* 24: 853–861.
52. Enguita M, Gregorio-Rocasalano N, Abad A, Trullas R (2005) Glycogen synthase kinase 3 activity mediates neuronal pentraxin 1 expression and cell death induced by potassium deprivation in cerebellar granule cells. *Mol Pharmacol* 67: 1237–1246.
53. Cross DA, Alessi DR, Cohen P, Andjelkovich M, Hemmings BA (1995) Inhibition of glycogen synthase kinase-3 by insulin mediated by protein kinase B. *Nature* 378: 785–789.
54. Bhat R, Xue Y, Berg S, Hellberg S, Ormo M, et al. (2003) Structural insights and biological effects of glycogen synthase kinase 3-specific inhibitor AR-A014418. *J Biol Chem* 278: 45937–45945.
55. Coghlan MP, Culbert AA, Cross DA, Corcoran SL, Yates JW, et al. (2000) Selective small molecule inhibitors of glycogen synthase kinase-3 modulate glycogen metabolism and gene transcription. *Chem Biol* 7: 793–803.
56. Hetman M, Kanning K, Cavanaugh JE, Xia Z (1999) Neuroprotection by brain-derived neurotrophic factor is mediated by extracellular signal-regulated kinase and phosphatidylinositol 3-kinase. *J Biol Chem* 274: 22569–22580.
57. Zhao H, Sapolsky RM, Steinberg GK (2006) Phosphoinositide-3-kinase/akt survival signal pathways are implicated in neuronal survival after stroke. *Mol Neurobiol* 34: 249–270.
58. Namikawa K, Honma M, Abe K, Takeda M, Mansur K, et al. (2000) Akt/protein kinase B prevents injury-induced motoneuron death and accelerates axonal regeneration. *J Neurosci* 20: 2875–2886.
59. Ries V, Henchcliffe C, Kareva T, Rzhetskaya M, Bland R, et al. (2006) Oncoprotein Akt/PKB induces trophic effects in murine models of Parkinson's disease. *Proc Natl Acad Sci U S A* 103: 18757–18762.
60. Eilers A, Whitfield J, Babij C, Rubin LL, Ham J (1998) Role of the Jun kinase pathway in the regulation of c-Jun expression and apoptosis in sympathetic neurons. *J Neurosci* 18: 1713–1724.
61. Grimes CA, Jope RS (2001) The multifaceted roles of glycogen synthase kinase 3 $\beta$  in cellular signaling. *Prog Neurobiol* 65: 391–426.
62. Herdegen T, Claret FX, Kallunki T, Martin-Villalba A, Winter C, et al. (1998) Lasting N-terminal phosphorylation of c-Jun and activation of c-Jun N-terminal kinases after neuronal injury. *J Neurosci* 18: 5124–5135.
63. Mielke K, Brecht S, Dorst A, Herdegen T (1999) Activity and expression of JNK1, p38 and ERK kinases, c-Jun N-terminal phosphorylation, and c-Jun promoter binding in the adult rat brain following kainate-induced seizures. *Neuroscience* 91: 471–483.
64. Watson A, Eilers A, Lallemand D, Kyriakis J, Rubin LL, et al. (1998) Phosphorylation of c-Jun is necessary for apoptosis induced by survival signal withdrawal in cerebellar granule neurons. *J Neurosci* 18: 751–762.
65. Vila M, Jackson-Lewis V, Vukosavic S, Djaldetti R, Liberatore G, et al. (2001) Bax ablation prevents dopaminergic neurodegeneration in the 1-methyl-4-phenyl-1,2,3,6-tetrahydropyridine mouse model of Parkinson's disease. *Proc Natl Acad Sci U S A* 98: 2837–2842.
66. Gould TW, Buss RR, Vinsant S, Prevette D, Sun W, et al. (2006) Complete dissociation of motor neuron death from motor dysfunction by Bax deletion in a mouse model of ALS. *J Neurosci* 26: 8774–8786.
67. Shamas-Din A, Brahmabhatt H, Leber B, Andrews DW (2011) BH3-only proteins: Orchestrators of apoptosis. *Biochim Biophys Acta* 1813: 508–520.
68. Datta SR, Dudek H, Tao X, Masters S, et al. (1997) Akt phosphorylation of BAD couples survival signals to the cell-intrinsic death machinery. *Cell* 91: 231–241.
69. del PL, Gonzalez-Garcia M, Page C, Herrera R, Nunez G (1997) Interleukin-3-induced phosphorylation of BAD through the protein kinase Akt. *Science* 278: 687–689.
70. Linseman DA, Phelps RA, Bouchard RJ, Le SS, Laessig TA, et al. (2002) Insulin-like growth factor-I blocks Bcl-2 interacting mediator of cell death (Bim) induction and intrinsic death signaling in cerebellar granule neurons. *J Neurosci* 22: 9287–9297.
71. Putha GV, Moulder KL, Golden JP, Bouillet P, Adams JA, et al. (2001) Induction of BIM, a proapoptotic BH3-only BCL-2 family member, is critical for neuronal apoptosis. *Neuron* 29: 615–628.
72. Whitfield J, Neame SJ, Paquet L, Bernard O, Ham J (2001) Dominant-negative c-Jun promotes neuronal survival by reducing BIM expression and inhibiting mitochondrial cytochrome c release. *Neuron* 29: 629–643.
73. Coultas L, Terzano S, Thomas T, Voss A, Reid K, et al. (2007) Hrk/DP5 contributes to the apoptosis of select neuronal populations but is dispensable for haematopoietic cell apoptosis. *J Cell Sci* 120: 2044–2052.
74. Cregan SP, Arbour NA, MacLaurin JG, Callaghan SM, Fortin A, et al. (2004) p53 activation domain 1 is essential for Puma upregulation and p53-mediated neuronal cell death. *The Journal of Neuroscience* 24: 10003–10012.
75. Uo T, Kinoshita Y, Morrison RS (2007) Apoptotic actions of p53 require transcriptional activation of PUMA and do not involve a direct mitochondrial/cytoplasmic site of action in postnatal cortical neurons. *J Neurosci* 27: 12198–12210.
76. Yu J, Zhang L (2008) PUMA, a potent killer with or without p53. *Oncogene* 27 Suppl 1: S71–S83.
77. Enokido Y, Araki T, Tanaka K, Aizawa S, Hatanaka H (1996) Involvement of p53 in DNA strand break-induced apoptosis in postmitotic CNS neurons. *Eur J Neurosci* 8: 1812–1821.
78. Brunet A, Bonni A, Zigmond MJ, Lin MZ, Joo P, et al. (1999) Akt promotes cell survival by phosphorylating and inhibiting a Forkhead transcription factor. *Cell* 96: 857–868.
79. Gilley J, Coffey PJ, Ham J (2003) FOXO transcription factors directly activate bim gene expression and promote apoptosis in sympathetic neurons. *J Cell Biol* 162: 613–622.
80. You H, Pellegrini M, Tsuchihara K, Yamamoto K, Hacker G, et al. (2006) FOXO3a-dependent regulation of Puma in response to cytokine/growth factor withdrawal. *J Exp Med* 203: 1657–1663.
81. Graef IA, Mermelstein PG, Stankunas K, Neilson JR, Deisseroth K, et al. (1999) L-type calcium channels and GSK-3 regulate the activity of NF-ATc4 in hippocampal neurons. *Nature* 401: 703–708.
82. Benedict AB, Lehtinen M, Massol R, Lopes UG, Kirchhausen T, et al. (2005) The transcription factor NFAT3 mediates neuronal survival. *J Biol Chem* 280: 2818–2825.
83. Chung H, Seo S, Moon M, Park S (2008) Phosphatidylinositol-3-kinase/Akt/glycogen synthase kinase-3 $\beta$  and ERK1/2 pathways mediate protective effects of acylated and unacylated ghrelin against oxygen-glucose deprivation-induced apoptosis in primary rat cortical neuronal cells. *Journal of Endocrinology* 198: 511–521.
84. Chong ZZ, Li F, Maiese K (2006) Group I metabotropic receptor neuroprotection requires Akt and its substrates that govern FOXO3a, Bim, and beta-catenin during oxidative stress. *Curr Neurovasc Res* 3: 107–117.
85. Ham J, Eilers A, Whitfield J, Neame SJ, Shah B (2000) c-Jun and the transcriptional control of neuronal apoptosis. *Biochem Pharmacol* 60: 1015–1021.
86. Ham J, Babij C, Whitfield J, Pfarr CM, Lallemand D, et al. (1995) A c-Jun dominant negative mutant protects sympathetic neurons against programmed cell death. *Neuron* 14: 927–939.
87. Estus S, Zaks WJ, Freeman RS, Gruda M, Bravo R, et al. (1994) Altered gene expression in neurons during programmed cell death: identification of c-jun as necessary for neuronal apoptosis. *J Cell Biol* 127: 1717–1727.
88. Mei Y, Yuan Z, Song B, Li D, Ma C, et al. (2008) Activating transcription factor 3 up-regulated by c-Jun NH(2)-terminal kinase/c-Jun contributes to apoptosis induced by potassium deprivation in cerebellar granule neurons. *Neuroscience* 151: 771–779.
89. Yuan Z, Gong S, Luo J, Zheng Z, Song B, et al. (2009) Opposing roles for ATF2 and c-Fos in c-Jun-mediated neuronal apoptosis. *Mol Cell Biol* 29: 2431–2442.
90. Cazanave SC, Mott JL, Elmi NA, Bronk SF, Werneburg NW, et al. (2009) JNK1-dependent PUMA expression contributes to hepatocyte lipooapoptosis. *J Biol Chem* 284: 26591–26602.
